# Supplementary material for: Chlorella pyrenoidosa Polysaccharides as a Prebiotic to Modulate Gut Microbiota: Physicochemical Properties and Fermentation Characteristics In Vitro
Source: MDPI journal article supplement (doi:10.3390/foods11050725), 2022-03-01
Supplement: s1 [file s1]

## Supporting Information

### *Chlorella Pyrenoidosa* Polysaccharides as a Prebiotic to Modulate Gut Microbiota: Physicochemical Properties and Fermentation Characteristics *in Vitro*

Kunling Lv <sup>1,2,†</sup>, Qingxia Yuan <sup>2,†</sup>, Hong Li <sup>2</sup>, Tingting Li <sup>2</sup>, Haiqiong Ma <sup>2</sup>,  
Chenghai Gao <sup>2</sup>, Siyuan Zhang <sup>1,\*</sup>, Yonghong Liu <sup>2</sup> and Longyan Zhao <sup>2,\*</sup>

<sup>1</sup> College of Light Industry and Food Engineering, Guangxi University, Nanning 530004, P. R. China; kunlinglv@foxmail.com

<sup>2</sup> Institute of Marine Drugs, Guangxi University of Chinese Medicine, Nanning 530200, P. R. China; qingxiayuan@163.com (Q.Y.); hongli12212022@163.com (H.L.); li15578909861@126.com (T.L.); MHQ18878839254@163.com (H.M.); gaochh@gxTCMU.edu.cn (C.G.)

\* Correspondence: zhangsiyuangx@sina.com (S.Z.); longyanzhao@gmail.com (L.Z.)

† These authors contributed equally to this work.

**Table S1.** Content changes of total carbohydrates and reducing sugars during digestion.

| Processes                  | Digestion time (h) | Total carbohydrates (%)    | Reducing sugars (%)        |
|----------------------------|--------------------|----------------------------|----------------------------|
| Saliva digestion           | 0                  | 100.00 ± 2.91 <sup>a</sup> | 100.00 ± 0.59 <sup>a</sup> |
|                            | 0.5                | 102.61 ± 1.94 <sup>a</sup> | 101.04 ± 0.59 <sup>a</sup> |
|                            | 1                  | 106.04 ± 3.30 <sup>a</sup> | 101.14 ± 1.61 <sup>a</sup> |
|                            | 2                  | 102.47 ± 2.91 <sup>a</sup> | 99.79 ± 0.59 <sup>a</sup>  |
| Gastric digestion          | 0                  | 100.00 ± 0.00 <sup>a</sup> | 100.00 ± 1.68 <sup>a</sup> |
|                            | 2                  | 99.67 ± 0.47 <sup>a</sup>  | 97.63 ± 1.68 <sup>a</sup>  |
|                            | 4                  | 105.34 ± 1.89 <sup>a</sup> | 100.00 ± 1.68 <sup>a</sup> |
|                            | 6                  | 103.67 ± 4.24 <sup>a</sup> | 98.82 ± 3.35 <sup>a</sup>  |
| Gastrointestinal digestion | 0                  | 100.00 ± 2.21 <sup>a</sup> | 100.00 ± 0.46 <sup>a</sup> |
|                            | 2                  | 100.34 ± 0.16 <sup>a</sup> | 99.08 ± 0.69 <sup>a</sup>  |
|                            | 4                  | 102.80 ± 0.47 <sup>a</sup> | 100.49 ± 1.15 <sup>a</sup> |
|                            | 6                  | 101.79 ± 0.32 <sup>a</sup> | 99.02 ± 0.92 <sup>a</sup>  |

In each column, values that do not share a common letter superscript represent significant differences at  $p < 0.05$ .

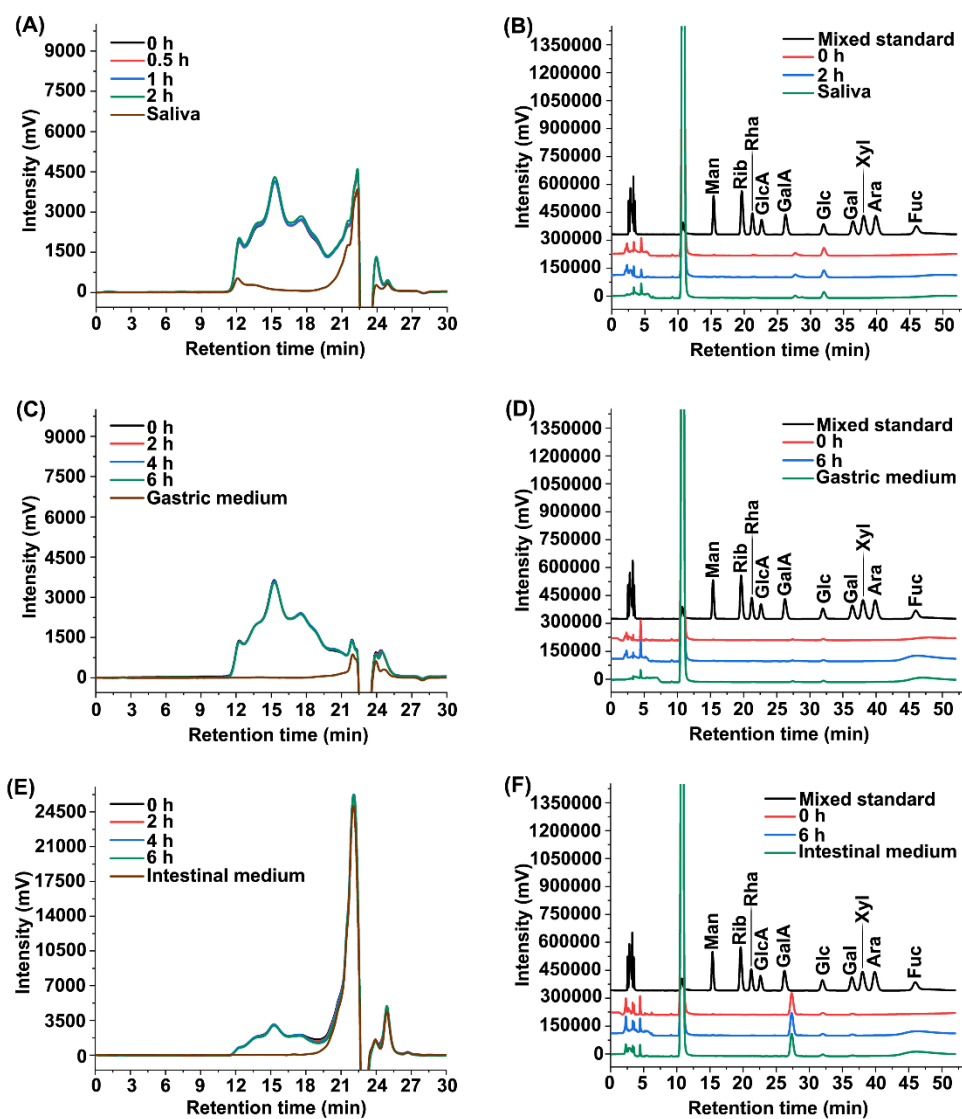

**Figure S1.** Changes of molecular weight and released free monosaccharides of CPP during simulated digestion (saliva digestion, A & B; gastric digestion, C & D; small intestine digestion, E & F).
